# Supplementary material for: NBI-921352, a first-in-class, NaV1.6 selective, sodium channel inhibitor that prevents seizures in Scn8a gain-of-function mice, and wild-type mice and rats
Source: eLife. 2022 Mar 2;11:e72468. doi: 10.7554/eLife.72468 (PMC8903829; doi:10.7554/eLife.72468)
Supplement: Figure 1—figure supplement 2—source data 1. [file elife-72468-fig1-figsupp2-data1.xlsx]

## Sheet: Figure 1-figure supplement 2
Error bars in figure are Std Errors calculated in Graphpad Prism based on N and Std Dev data below
		Fraction of hNav1.6 current blocked
	[NBI-921352] (µM)	mean	Std Dev	n (Cells)
	10	0.997733	0.0289228	3
	3.33	0.969474	0.0159145	5
	1.11	0.949862	0.00982114	3
	0.37	0.831899	0.046113	4
	0.123	0.668801	0.100759	2
	0.0412	0.496589	0.0882656	5
	0.0137	0.154745	0.101605	3
	0.0046	-0.0112849	0.00260452	2
