# Supplementary material for: NBI-921352, a first-in-class, NaV1.6 selective, sodium channel inhibitor that prevents seizures in Scn8a gain-of-function mice, and wild-type mice and rats
Source: eLife. 2022 Mar 2;11:e72468. doi: 10.7554/eLife.72468 (PMC8903829; doi:10.7554/eLife.72468)
Supplement: Figure 1—source data 1. [file elife-72468-fig1-data1.xlsx]

## Sheet: Figure 1
Error bars in figure are Std Errors calculated in Graphpad Prism based on Ns and Std Dev data below
[NBI-912352] (Log M)	hNav1.6 current in (352)/(Vehicle)			hNav1.1 current in (352)/(Vehicle)			hNav1.2 current (352)/(Vehicle)			hNav1.7 current (352)/(Vehicle)			hNaV1.5 current (352)/(Vehicle)			hNaV1.4 current(352)/(Vehicle)			hNaV1.3 current (352)/(Vehicle)			mNaV1.1 current (352)/(Vehicle)			mNaV1.2 current (352)/(Vehicle)			mNaV1.6 current (352)/(Vehicle)
	mean	Std Dev	n (cells)	mean	Std Dev	n (cells)	mean	Std Dev	n (cells)	mean	Std Dev	n (cells)	mean	Std Dev	n (cells)	mean	Std Dev	n (cells)	mean	Std Dev	n (cells)
-5	0.96	0.021	8
-5.47716	0.91	0.054	10
-5.95429	0.87	0.032	9
-6.4318	0.85	0.054	8
-6.47756	0.83	0.053	6
-6.91009	0.68	0.067	9
-6.95468	0.66	0.111	4
-7.38722	0.57	0.097	9
-7.4318	0.52	0.012	2
-7.85387	0.25	0.097	8
-8.30103	0.16		1
-8.39794	0.12	0.062	5
-9.34679	0.01	0.057	4
-4				0.68	0.028	20
-4.30103				0.57	0.046	7
-4.47713				0.44	0.066	33
-4.77814				0.3	0.022	12
-4.95425				0.25	0.076	30
-5.25524				0.16	0.038	9
-5.43133				0.12	0.055	30
-5.73236				0.07	0.04	7
-5.90833				0.07	0.093	26
-6.20971				0.04	0.084	10
-6.3851				0.03	0.066	26
-6.68613				0.05	0.088	10
-6.86328				0.01	0.076	28
-7.16115				0.04	0.05	8
-7.33724				0	0.06	31
-7.63827				0.01	0.07	10
-4							0.88	0.028	5
-4.47713							0.78	0.046	11
-4.95425							0.6	0.066	11
-5							0.66	0.022	3
-5.43133							0.42	0.076	9
-5.47716							0.44	0.038	4
-5.90833							0.21	0.055	11
-5.95429							0.14	0.04	5
-6.3851							0.11	0.093	9
-6.4318							0.07	0.084	5
-6.86328							0.04	0.066	13
-6.91009							0.03	0.088	3
-7.33724							0.01	0.076	10
-7.38722							0	0.05	2
-7.85387							0.01	0.06	5
-8.30103							0.01	0.07	9
-4.52288										0.74	0.077	4				0.46	0.077	12	0.17	0.075	9
-5										0.41	0.134	8				0.24	0.088	19	0.03	0.072	9
-5.47716										0.2	0.142	8				0.11	0.084	11	0.01	0.072	9
-5.95429										0.08	0.06	4				0.05	0.111	21	-0.01	0.141	6
-6.4318										0.01	0.043	4				0	0.073	15	0.01	0.088	11
-6.91009										0.02	0.142	8				0		1	0.01	0.095	15
-7.38722										0.01	0.107	5				0.01	0.085	22	0.02	0.079	13
-7.85387										0.02	0.125	7				-0.12	0.103	7	-0.01	0.089	10
-8.30103										-0.02	0.099	10				0.02	0.118	12
-4.52288													0.24	0.161	4
-5													0.1	0.117	4
-5.47716													0.02	0.052	4
-5.95429													0.05	0.112	2
-6.4318													0.04	0.124	3
-6.91009													0.04	0.089	2
-7.38722													-0.02	0.052	6
-7.85387													0.03	0.042	7
-4.22185																						0.61	0.04	18	0.86	0.043	9
-4.69897																						0.28	0.057	15	0.58	0.059	13
-5.17607																						0.19	0.038	23	0.39	0.096	16
-5.65326																						0.12	0.075	20	0.19	0.101	6
-6.13018																						0.05	0.095	20	0.14	0.1	21
-6.6073																						-0.03	0.084	19	0.04	0.137	9
-7.08619																						-0.01	0.076	19	0.08	0.144	14
-7.56864																						0	0.088	17	0.05	0.197	10
-5																												0.92	0.047	39
-5.47716																												0.9	0.038	34
-5.95429																												0.84	0.057	39
-6.4318																												0.78	0.059	31
-6.91009																												0.63	0.078	23
-7.38722																												0.48	0.101	29
-7.85387																												0.27	0.094	33
-8.30103																												0.12	0.11	35
