# Supplementary material for: NBI-921352, a first-in-class, NaV1.6 selective, sodium channel inhibitor that prevents seizures in Scn8a gain-of-function mice, and wild-type mice and rats
Source: eLife. 2022 Mar 2;11:e72468. doi: 10.7554/eLife.72468 (PMC8903829; doi:10.7554/eLife.72468)
Supplement: Figure 2—source data 1. [file elife-72468-fig2-data1.xlsx]

## Sheet: Figure 2
Error bars in figure are Std Errors calculated in Graphpad Prism based on Ns and Std Dev data below
	h1.6 -N1466K 145756			h1.6-R850Q 145756			h1.6-I1327V 145756			h1.6-T767I 145756			h1.6-N984K 145756			h1.6-N1768D 145756 norm			h1.6-R1872W 145756			h1.6-R1617Q 145756			h1.6-N1877S 145756 norm
[NBI-921352] (LogM)	Mean	Std Dev	N (cells)	Mean	Std Dev	N (cells)	Mean	Std Dev	N (cells)	Mean	Std Dev	N (cells)	Mean	Std Dev	N (cells)	Mean	Std Dev	N (cells)	Mean	Std Dev	N (cells)	Mean	Std Dev	N (cells)	Mean	Std Dev	N (cells)
-5	0.92	0.091	5	0.91	0.044	7	0.91	0.059	7	0.91	0.057	8	0.94	0.034	8	0.9	0.042	4							0.94	0.013	4
-5.47716	0.94	0.084	5	0.88	0.055	5	0.88	0.04	4	0.92	0.049	6	0.92	0.034	15	0.88	0.077	3							0.93	0.002	2
-5.95429	0.81	0.08	7	0.86	0.045	6	0.9	0.048	7	0.86	0.044	6	0.89	0.029	10	0.82	0.054	3							0.88	0.048	5
-6.4318	0.73	0.06	10	0.83	0.05	7	0.82	0.037	2	0.86	0.059	9	0.81	0.052	4	0.74	0.073	7							0.84	0.03	4
-6.91009	0.69	0.089	7	0.79	0.074	3	0.67	0.096	11	0.75	0.028	5	0.66	0.052	11	0.62	0.037	6							0.68	0.076	4
-7.38722	0.47	0.104	7	0.58	0.088	3	0.56	0.113	5	0.58	0.075	8	0.56	0.054	11	0.46	0.058	8							0.53	0.078	6
-7.85387	0.32	0.118	9	0.43	0.086	5	0.29	0.078	5	0.19	0.037	5	0.33	0.064	7	0.18	0.072	4							0.27	0.092	3
-8.33	0.15	0.072	4	0.13	0.049	3	0.13	0.061	3	0.1	0.085	4	0.09	0.038	5	0.03	0.04	5							0.1		1
-5																			0.9	0.035	8	0.85	0.038	3
-6																			0.87	0.094	11	0.64	0.029	3
-7																			0.55	0.117	9	0.24	0.057	7
-8																			0.13	0.084	11	0.07	0.066	2
Dose Response data was fit to determine the IC50 values shown in Figure 2 (and reported in the text).
