# Supplementary material for: NBI-921352, a first-in-class, NaV1.6 selective, sodium channel inhibitor that prevents seizures in Scn8a gain-of-function mice, and wild-type mice and rats
Source: eLife. 2022 Mar 2;11:e72468. doi: 10.7554/eLife.72468 (PMC8903829; doi:10.7554/eLife.72468)
Supplement: Figure 3—source data 1. [file elife-72468-fig3-data1.xlsx]

## Sheet: Figure 3
Error bars in figure are Std Errors calculated in Graphpad Prism based on N and Std Dev data below
[NBI-912352] (Log M)	hNav1.6 current in (352)/(Vehicle)			N1768D current in (352)/(Vehicle)			N1768D current in (352)/(Vehicle)			hNav1.6 current in (352)/(Vehicle)
		Inactivated (-45mV)			Resurgent			Persistent			Rested (-120mV)
	mean	Std Dev	n (cells)	mean	Std Dev	n (cells)	mean	Std Dev	n (cells)	mean	Std Dev	n (cells)
-5	0.96	0.021	8
-5.47716	0.91	0.054	10
-5.95429	0.87	0.032	9
-6.4318	0.85	0.054	8
-6.47756	0.83	0.053	6
-6.91009	0.68	0.067	9
-6.95468	0.66	0.111	4
-7.38722	0.57	0.097	9
-7.4318	0.52	0.012	2
-7.85387	0.25	0.097	8
-8.30103	0.16		1
-8.39794	0.12	0.062	5
-9.34679	0.01	0.057	4
-5	10			0.94	0.317	3
-5.47716	3.33304			0.88		1
-5.95429	1.11099			0.86	0.089	3
-6.4318	0.369999			0.88	0.121	3
-6.91009	0.123001			0.8	0.068	2
-7.38722	0.0409996			0.57	0.192	6
-7.85387	0.0140001			0.18	0.09	4
-5							0.93	0.078	6
-5.47712							0.92	0.204	8
-5.95424							0.91	0.194	5
-6.43136							0.87	0.054	6
-6.90848							0.63	0.087	2
-7.38561							0.44	0.067	8
-7.86274							0.21	0.135	4
-8.33989							0	0.086	5
-4	100									0.870588	0.062	2
-4.47713	33.333									0.435294	0.066	4
-4.95425	11.111									0.176471	0.081	4
-5.43133	3.704									0.0941176	0.134	3
-5.90833	1.235									-0.0117647	0.059	4
-6.3851	0.412									-0.0235294	0.114	6
-6.86328	0.137									0.117647	0.122	3
-7.33724	0.046									0.0588235	0.096	4
