# Supplementary material for: NBI-921352, a first-in-class, NaV1.6 selective, sodium channel inhibitor that prevents seizures in Scn8a gain-of-function mice, and wild-type mice and rats
Source: eLife. 2022 Mar 2;11:e72468. doi: 10.7554/eLife.72468 (PMC8903829; doi:10.7554/eLife.72468)
Supplement: Figure 4—figure supplement 1—source data 1. [file elife-72468-fig4-figsupp1-data1.xlsx]

## Sheet: Figure 4-figure supplement 1
WT Cortical pyramidal neurons APs/1s				Fast spiking interneurons APs/1s						WT Cortical pyramidal neurons APs/1s					Fast spiking interneurons APs/1s
200 pA current injected				220 pA current injected						165 pA current injected					300 pA current injected
	Control	0.25 μM NBI-921352			Control	0.25 μM NBI-921352				Control	100 μM CBZ				Control	100 μM CBZ
Neuron 1	11	0		Neuron 1	47	51			Neuron 1	17	4			Neuron 1	54	26
Neuron 2	18	12		Neuron 2	53	58			Neuron 2	16	11			Neuron 2	76	30
Neuron 3	20	13		Neuron 3	59	67			Neuron 3	13	3			Neuron 3	58	6
									Neuron 4	11	5
