# Supplementary material for: NBI-921352, a first-in-class, NaV1.6 selective, sodium channel inhibitor that prevents seizures in Scn8a gain-of-function mice, and wild-type mice and rats
Source: eLife. 2022 Mar 2;11:e72468. doi: 10.7554/eLife.72468 (PMC8903829; doi:10.7554/eLife.72468)
Supplement: Figure 4—source data 1. [file elife-72468-fig4-data1.xlsx]

## Sheet: Figure 4
Error bars in figure are Std Errors calculated in prism from these data sets
	Panel A: WT Cortical pyramidal neurons APs/1s								Panel B: Fast spiking interneurons APs/1s									Panel C: WT Cortical pyramidal neurons APs/1s											Panel D: Fast spiking interneurons APs/1s
	Control			0.25 μM NBI-921252						Control			0.25 μM NBI-921252						Control				100 μM Carbamazepine							Control			100 μM Carbamazepine
Current Injected (pA)	Neuron 1	Neuron 2	Neuron 3	Neuron 1	Neuron 2	Neuron 3			Current Injected (pA)	Neuron 1	Neuron 2	Neuron 3	Neuron 1	Neuron 2	Neuron 3			Current Injected (pA)	Neuron 1	Neuron 2	Neuron 3	Neuron 4	Neuron 1	Neuron 2	Neuron 3	Neuron 4			Current Injected (pA)	Neuron 1	Neuron 2	Neuron 3	Neuron 1	Neuron 2	Neuron 3
-20	0	0	0	0	0	0			-20	0	0	0	0	0	0			-20	0	0	0	0	0	0	0	0			-20	0	0	0	0	0	0
0	0	0	0	0	0	0			0	0	0	0	0	0	0			0	0	0	0	0	0	0	0	0			0	0	0	0	0	0	0
20	0	0	0	0	0	0			20	0	0	0	0	0	0			20	0	0	0	0	0	0	0	0			20	0	0	0	0	0	0
40	0	3	3	0	0	0			40	0	0	0	0	0	0			40	0	0	5	3	0	0	0	0			40	0	0	0	0	0	0
60	0	6	7	0	1	2			60	0	1	0	0	0	17			60	5	0	7	5	0	3	1	1			60	0	0	0	0	0	0
80	0	9	9	0	4	6			80	1	19	19	0	1	25			80	9	6	9	9	2	5	2	3			80	0	0	1	0	0	0
100	0	11	12	0	6	8			100	25	28	29	20	25	33			100	11	9	11	8	2	7	3	4			100	0	1	1	0	0	0
120	3	12	14	0	7	9			120	30	34	35	28	33	39			120	14	12	12	12	3	8	3	5			120	10	2	5	1	1	0
140	5	14	16	0	8	10			140	34	39	41	34	40	45			140	15	14	13	13	3	10	3	5			140	22	3	9	2	2	1
160	8	15	17	0	9	12			160	38	43	46	38	46	52			160	17	16	13	11	4	11	3	5			160	31	10	11	6	6	1
180	9	16	18	0	11	11			180	41	46	51	43	50	57			180	18	18	11	12	3	12	3	5			180	36	22	12	10	9	1
200	11	18	20	0	12	13			200	44	50	55	47	55	62			200	19	19	4	14	4	13	4	5			200	41	57	37	15	16	1
220	12	18	21	1	13	14			220	47	53	59	51	58	67			220	20	19	2	15	5	13	4	5			220	43	62	43	15	17	2
240	13	19	22	3	14	15			240	51	56	64	55	62	73			240	22	20	2	16	4	14	3	5			240	47	68	46	20	21	2
260	14	20	23	4	15	13			260	54	59	67	58	65	77			260	22	21		17	5	15	2	5			260	49	71	50	23	21	3
280	15	21	23	4	15	13			280	57	63	73	61	70	82			280	23	21		18	5	15	2	5			280	53	76	55	26	24	3
300	16	22	24	4	17	13			300	60	66	78	65	73	86			300	23	21		19	5	16		5			300	54	76	58	26	30	6
320	16	23	24	5	18	13			320	63	69	82	68	76	89			320	24	22		20	4	16		5			320	56	77	62	28	27	6
340	17	23	25	5	19	12			340	65	73	87	70	80	96			340	25	22		21	5	16		4			340	59	77	64	28	32	7
360	18	24	25	6	20	12			360	68	76	94	73	83	100			360		22		23		15		5			360	60	79	67	29	32	9
380	18	24	26	7	21	7			380	70	79	97	74	83	100			380		23		24		15		5			380	64		69	30		10
400	19	26	26	8	22	13			400	72	82	102	75	86	103			400		23		24		14		5			400	67		70	27		9
420	19	26	27	7	22	5			420	74	84	107	77	87	101			420		23		7		14		4			420	68		72	31		9
440	20	26	26	7	23	4			440	75	87	109	77	88	103			440		23		5		11		4			440	63		75	30		10
	blue points not plotted on graph for clarity
AREA UNDER THE CURVE STATISTICAL ANALYSIS - CUMULATIVE NUMBER OF ACTION POTENTIALS FIRED BY EACH CELL ON INCREASING CURRENT INJECTIONS
	Control			250 nM NBI-921252						Control			250 nM NBI-921252						Control				100 μM Carbamazepine							Control			100 μM Carbamazepine
Current Injected (pA)	Neuron 1	Neuron 2	Neuron 3	Neuron 1	Neuron 2	Neuron 3	P Value, Paired 2-Tail t-test		Current Injected (pA)	Neuron 1	Neuron 2	Neuron 3	Neuron 1	Neuron 2	Neuron 3	P Value, Paired 2-Tail t-test		Current Injected (pA)	Neuron 1	Neuron 2	Neuron 3	Neuron 4	Neuron 1	Neuron 2	Neuron 3	Neuron 4	P Value, Paired 2-Tail t-test		Current Injected (pA)	Neuron 1	Neuron 2	Neuron 3	Neuron 1	Neuron 2	Neuron 3	P Value, Paired 2-Tail t-test
-20	0	0	0	0	0	0			-20	0	0	0	0	0	0			-20	0	0	0	0	0	0	0	0			-20	0	0	0	0	0	0
0	0	0	0	0	0	0			0	0	0	0	0	0	0			0	0	0	0	0	0	0	0	0			0	0	0	0	0	0	0
20	0	0	0	0	0	0			20	0	0	0	0	0	0			20	0	0	0	0	0	0	0	0			20	0	0	0	0	0	0
40	0	3	3	0	0	0	0.183503		40	0	0	0	0	0	0			40	0	0	5	3	0	0	0	0	0.200976		40	0	0	0	0	0	0
60	0	9	10	0	1	2	0.183503		60	0	1	0	0	0	17	0.457549		60	5	0	12	8	0	3	1	1	0.187993		60	0	0	0	0	0	0
80	0	18	19	0	5	8	0.186324		80	1	20	19	0	1	42	0.941974		80	14	6	21	17	2	8	3	4	0.0967576		80	0	0	1	0	0	0	0.42265
100	0	29	31	0	11	16	0.186857		100	26	48	48	20	26	75	0.983664		100	25	15	32	25	4	15	6	8	0.0658728		100	0	1	2	0	0	0	0.225403
120	3	41	45	0	18	25	0.132847		120	56	82	83	48	59	114	1		120	39	27	44	37	7	23	9	13	0.0423905		120	10	3	7	1	1	0	0.102242
140	8	55	61	0	26	35	0.0852256		140	90	121	124	82	99	159	0.931442		140	54	41	57	50	10	33	12	18	0.0331754		140	32	6	16	3	3	1	0.172376
160	16	70	78	0	35	47	0.0419672		160	128	164	170	120	145	211	0.823868		160	71	57	70	61	14	44	15	23	0.0279887		160	63	16	27	9	9	2	0.171313
180	25	86	96	0	46	58	0.0182459		180	169	210	221	163	195	268	0.69796		180	89	75	81	73	17	56	18	28	0.0237636		180	99	38	39	19	18	3	0.127344
200	36	104	116	0	58	71	0.00559471		200	213	260	276	210	250	330	0.569612		200	108	94	85	87	21	69	22	33	0.0208666		200	140	95	76	34	34	4	0.0277079
220	48	122	137	1	71	85	0.000932029		220	260	313	335	261	308	397	0.461715		220	128	113	87	102	26	82	26	38	0.0213387		220	183	157	119	49	51	6	0.00507312
240	61	141	159	4	85	100	0.00023653		240	311	369	399	316	370	470	0.375468		240	150	133	89	118	30	96	29	43	0.0251081		240	230	225	165	69	72	8	0.000216301
260	75	161	182	8	100	113	0.00133721		260	365	428	466	374	435	547	0.315355		260	172	154		135	35	111	31	48	0.0818234		260	279	296	215	92	93	11	0.000772834
280	90	182	205	12	115	126	0.00264018		280	422	491	539	435	505	629	0.265804		280	195	175		153	40	126	33	53	0.0803825		280	332	372	270	118	117	14	0.00326197
300	106	204	229	16	132	139	0.00506332		300	482	557	617	500	578	715	0.223232		300	218	196		172	45	142		58	0.0804683		300	386	448	328	144	147	20	0.00540055
320	122	227	253	21	150	152	0.00731857		320	545	626	699	568	654	804	0.189148		320	242	218		192	49	158		63	0.0801721		320	442	525	390	172	174	26	0.0079266
340	139	250	278	26	169	164	0.0109594		340	610	699	786	638	734	900	0.165753		340	267	240		213	54	174		67	0.0793941		340	501	602	454	200	206	33	0.00948394
360	157	274	303	32	189	176	0.0145061		360	678	775	880	711	817	1000	0.14288		360		262		236		189		72	0.23339		360	561	681	521	229	238	42	0.0110158
380	175	298	329	39	210	183	0.0204233		380	748	854	977	785	900	1100	0.12826		380		285		260		204		77	0.234719		380	625		590	259		52	0.119696
400	194	324	355	47	232	196	0.0233298		400	820	936	1079	860	986	1203	0.114674		400		308		284		218		82	0.233166		400	692		660	286		61	0.120786
420	213	350	382	54	254	201	0.0293696		420	894	1020	1186	937	1073	1304	0.0936271		420		331		291		232		86	0.213587		420	760		732	317		70	0.124558
440	233	376	408	61	277	205	0.0360237		440	969	1107	1295	1014	1161	1407	0.0787256		440		354		296		243		90	0.185363		440	823		807	347		80	0.130949
	Green highlights show P<0.05 in 2 tailed paired t test
	blue points not plotted on graph for clarity
