# Supplementary material for: NBI-921352, a first-in-class, NaV1.6 selective, sodium channel inhibitor that prevents seizures in Scn8a gain-of-function mice, and wild-type mice and rats
Source: eLife. 2022 Mar 2;11:e72468. doi: 10.7554/eLife.72468 (PMC8903829; doi:10.7554/eLife.72468)
Supplement: Figure 5—source data 1. [file elife-72468-fig5-data1.xlsx]

## Sheet: Figure 5A, 5B, 5C
Error bars in figures are standard errors for concentrations. No error bars are provided for dose since it is dictated by experiment. No y-axis error bars are shown since this is a simple fraction of animals that seized.
Study# and Dose group	Dose (mg/kg)	n (animals)	Mean [Plasma] (uM)	[Plasma] Std Err (uM)	Mean [Brain] (uM)	[Brain] Std Err (uM)	SCN8a mouse 6Hz acute	SCN8a mouse 6Hz chronic
							Fraction of animals seizing	Fraction of animals seizing
Study16086 NBI-921352 3 mpk	3	5	0.003985	0.000459	0.03657	0.001145	0.8
Study16086 NBI-921352 10 mpk	10	5	0.0154107	0.00186147	0.064764	0.003628	0.4
Study16086 NBI-921352 30 mpk	30	5	0.10935	0.0117351	0.125288	0.005648	0.4
Study16086 NBI-921352 100 mpk	100	4	0.538495	0.162684	0.346686	0.067823	0
Study16090 NBI-921352 3 mpk	3	6	0.003447	0.000924	0.003948	0.002355	0.8
Study16090 NBI-921352 10 mpk	10	7	0.00956466	0.00137442	0.025868	0.001961	0.57
Study16090 NBI-921352 30 mpk	30	7	0.125693	0.0456067	0.096588	0.018026	0.43
Study16090 NBI-921352 100 mpk	100	7	0.716663	0.187484	0.357047	0.080348	0.13
Study16096 NBI-921352 2 mpk day 1	2	5	0.001082	0.000139	0.00802	0.001086	0.8
Study16096 NBI-921352 6 mpk day 1	6	6	0.00495389	0.000280927	0.028146	0.002713	0.5
Study16096 NBI-921352 2 mpk day 7	2	6	0.002946	0.001163	0.010477	0.004689		0.5
Study16096 NBI-921352 6 mpk day 7	6	6	0.013189	0.00316	0.028813	0.00695		0.34
Study16171 NBI-921352 30 mpk 2 h	30	4	0.352777	0.084452	0.132983	0.019157	0.5
Study16092 NBI-921352 30 mpk 2 h	30	6	0.169492	0.052418	0.122368	0.021423	0.333
Study16105 NBI-921352 200 mpk	200	2	12.5575	8.86542	3.84617	2.51014	0
Study16105 NBI-921352 300 mpk	300	2	31.4827	15.8686	6.94166	2.00319	0
Study16187 NBI-921352 6 mpk day 1	6	6	0.00886375	0.0012554	0.0262404	0.00143468	0.667
Study16187 NBI-921352 6 mpk day 7	6	6	0.016629	0.001611	0.022014	0.001015		0.429
Study16160 NBI-921352 30 mpk	30	8	0.244237	0.0739803	0.0928691	0.0171729	0.5
Study16167 NBI-921352 6 mpk	6	7	0.00901382	0.00201508	0.0197705	0.00241414	0.834
Study16172 NBI-921352 6 mpk	6	7	0.0114947	0.00156606	0.0398449	0.00115519	0.715
Study17002 NBI-921352 6 mpk day 1	6	6	0.00770105	0.00125099	0.0212988	0.00132604	0.667
Study17002 NBI-921352 6 mpk day 7	6	6	0.020293	0.004025	0.019227	0.000494		0.5
Values in Red Excluded from analysis due to insufficient group size.

## Sheet: Figure 5D, 5E, 5F
Error bars in figures are standard errors for concentrations. No error bars are provided for dose since it is dictated by experiment. No y-axis error bars are shown since this is a simple fraction of animals that seized.
Study# and Dose group	Dose (mg/kg)	n (animals)	Mean [Plasma] (uM)	[Plasma] Std Err (uM)	Mean [Brain] (uM)	[Brain] Std Err (uM)	WT mouse DCMES acute	WT mouse DCMES Chronic
							Fraction of animals seizing	Fraction of animals seizing
Study16134 NBI-921352 10 mpk 2 h	10	7	0.101621	0.025824	0.057768	0.008171	0.428571
Study16134 NBI-921352 30 mpk 2 h	30	7	0.535982	0.131015	0.158829	0.023493	0.428571
Study16140 NBI-921352 3 mpk 2 h	3	7	0.009122	0.001473	0.029607	0.003526	0.714286
Study16140 NBI-921352 10 mpk 2 h	10	3	0.101222	0.012429	0.080311	0.008982	0.666667
Study16140 NBI-921352 30 mpk 2 h	30	3	0.271635	0.084608	0.142331	0.034517	0.333333
Study16140 NBI-921352 100 mpk 2 h	100	7	3.33327	0.395437	0.646194	0.045552	0.285714
Study16163 NBI-921352 30 mpk 2 h	30	5	2.73644	0.524301	0.396936	0.043115	0.4
Study16169 NBI-921352 200 mpk 2 h	200	6	34.7193	6.06391	3.87954	0.690618	0.166667
Study16155 NBI-921352 3 mpk day 1 2 h	3	5	0.011182	0.002145	0.014861	0.002216	0.8
Study16155 NBI-921352 10 mpk day 1 2 h	10	5	0.09418	0.00884	0.051912	0.004396	0.6
Study16155 NBI-921352 3 mpk day 7 2 h	3	5	0.017653	0.001273	0.012803	0.001392		0.4
Study16155 NBI-921352 10 mpk day 7 2 h	10	5	0.150768	0.038431	0.037705	0.006726		0.2
Study16205 NBI-921352 3 mpk day 1 2 h	3	8	0.017285	0.002346	0.04195	0.004261	0.75
Study16205 NBI-921352 5 mpk day 1 2 h	5	8	0.036755	0.005224	0.063019	0.005201	0.625
Study16205 NBI-921352 3 mpk day 7 2 h	3	8	0.01423	0.001839	0.019111	0.002153		0.25
Study16205 NBI-921352 5 mpk day 7 2 h	5	8	0.04296	0.006644	0.03771	0.004013		0.25
Study17007 NBI-921352 5 mpk day 1 2 h	5	7	0.021199	0.004694	0.025123	0.002686	0.714286
Study17007 NBI-921352 5 mpk day 7 2 h	5	7	0.030908	0.004915	0.02064	0.001796		0.285714
Values in Red Excluded from analysis due to insufficient group size.

## Sheet: Figure 5G, 5H, 5I
Error bars in figures are standard errors for concentrations. No error bars are provided for dose since it is dictated by experiment. No y-axis error bars are shown since this is a simple fraction of animals that seized.
Study# and Dose group	Dose (mg/kg)	n (animals)	Mean [Plasma] (uM)	[Plasma] Std Err (uM)	Mean [Brain] (uM)	[Brain] Std Err (uM)	WT mouse DCMES acute	WT mouse DCMES Chronic
							Fraction of animals seizing	Fraction of animals seizing
Study17001 NBI-921352 1 mpk	1	7	0.038803	0.010452	0.01541	0.001339	1
Study17001 NBI-921352 3 mpk	3	7	0.144352	0.029005	0.029109	0.002869	0.4
Study17003 NBI-921352 3 mpk	3	5	0.149748	0.029001	0.059163	0.003894	0.4
Study17003 NBI-921352 10 mpk	10	7	1.14738	0.12413	0.161144	0.011354	0.142857
Study17004 NBI-921352 3 mpk 2 h	3	6	0.19258	0.019855	0.034004	0.001176	0.6
Study17004 NBI-921352 1 mpk 2 h	1	6	0.077016	0.009174	0.016611	0.000885	0.75
Study17011 NBI-921352 1 mpk	1	4	0.071081	0.011218	0.020467	0.004433	0.75
Study17011 NBI-921352 30 mpk	30	5	2.32816	0.267831	0.213067	0.043963	0
Study17012 NBI-921352 1 mpk day 1	1	8	0.018281	0.002386	0.014293	0.000758	0.75
Study17012 NBI-921352 3 mpk day 1	3	7	0.057781	0.005958	0.028318	0.002069	0.571429
Study17012 NBI-921352 1 mpk day 7	1	7	0.033877	0.004967	0.012501	0.001112		0.428571
Study17012 NBI-921352 3 mpk day 7	3	8	0.123336	0.022139	0.039591	0.003132		0.25
