# Supplementary material for: NBI-921352, a first-in-class, NaV1.6 selective, sodium channel inhibitor that prevents seizures in Scn8a gain-of-function mice, and wild-type mice and rats
Source: eLife. 2022 Mar 2;11:e72468. doi: 10.7554/eLife.72468 (PMC8903829; doi:10.7554/eLife.72468)
Supplement: Figure 6—source data 1. [file elife-72468-fig6-data1.xlsx]

## Sheet: Figure 6
	Dose (mg/kg)	n (animals)	Mean [Brain] (uM)	[Brain] Std Err (uM)	WT mouse DC-MES acute	SCN8A mouse 6HZ	Rat DC-MES
					Fraction of animals seizing	Fraction of animals seizing	Fraction of animals seizing
Study18003 Lacosamide 3 mpk	3	8	3.4749	0.110727	0.625
Study18003 Lacosamide 10 mpk	10	8	11.511	0.696774	0.375
Study18003 Lacosamide 30 mpk	30	8	34.2631	2.19068	0.125
Study18053 Lacosamide 3 mpk	3	9	1.95307	0.204973	0.666667
Study18063 Lacosamide 3 mpk	3	8	1.26022	0.110006	0.75
Study18007 Lacosamide 3 mpk	3	7	2.83766	0.087555		0.429
Study18007 Lacosamide 10 mpk	10	7	9.32053	0.574953		0.286
Study18007 Lacosamide 30 mpk	30	7	20.9596	1.15599		0.286
Study18011 Lacosamide 1 mpk	1	7	0.728038	0.0516115		0.858
Study18011 Lacosamide 30 mpk	30	6	19.1727	1.75596		0.5
Study18011 Lacosamide 56 mpk	56	7	28.3359	3.11089		0.286
Study18028 Lacosamide 10 mpk	10	8	7.57902	0.380997		0.375
Study18042 Lacosamide 10 mpk	10	8	3.27106	0.20589		0.5
Study18060 Lacosamide 2 mpk	2	7	0.640726	0.01433			1
Study18060 Lacosamide 6 mpk	6	7	1.77741	0.069934			0.857143
Study18060 Lacosamide 12 mpk	12	7	3.74276	0.192759			0.571429
Study18068 Lacosamide 100 mpk	100	7	38.1728	2.88065			0
Study17131 CBZ 10 mpk	10	7	18.3226	3.1368	0.714286
Study17131 CBZ 30 mpk	30	7	43.0598	4.21896	0.428571
Study17131 CBZ 100 mpk	100	7	114.968	13.6915	0.142857
Study17134 CBZ 10 mpk	10	7	17.3876	1.36734	0.857143
Study17134 CBZ 30 mpk	30	7	46.0326	4.45396	0.428571
Study15064 CBZ 3 mpk	3	4	0.942635	0.113719		0.5
Study15064 CBZ 10 mpk	10	5	2.23739	0.572209		0.75
Study16152 CBZ 3 mpk	3	4	2.7011	0.19146		0.75
Study16152 CBZ 10 mpk	10	3	11.4303	0.768589		0.667
Study16152 CBZ 30 mpk	30	5	40.6698	2.59399		0
Study16162 CBZ 3 mpk	3	4	4.89045	0.297389		0.8
Study16162 CBZ 10 mpk	10	5	15.7134	0.989292		0.4
Study16162 CBZ 100 mpk	100	5	130.127	7.07212		0
Study18058 CBZ 3 mpk	3	7	0.9787	0.08242			1
Study18058 CBZ 10 mpk	10	7	4.242	0.3278			0.857
Study18058 CBZ 20 mpk	20	7	11	1.078			0.714
Study18068 CBZ 30 mpk	30	7	30.42	1.838			0.571
Study18068 CBZ 100 mpk	100	7	55.45	4.112			0.428
Study18085 CBZ 300 mpk	300	7	79.85	11.7			0.285
Study16130 Phenytoin 5 mpk	5	7	17.8786	0.675971	0.571429
Study16130 Phenytoin 10 mpk	10	7	38.3365	0.932073	0
Study17131 Phenytoin 2 mpk	2	6	6.11853	0.432389	0.666667
Study17136 Phenytoin 2 mpk	2	7	3.59684	0.259489	0.714286
Study17136 Phenytoin 5 mpk	5	8	10.9268	0.980407	0.625
Study16042 PHT 1 mpk	1	4	2.66541	0.14071		1
Study16042 PHT 3 mpk	3	4	11.7685	0.422266		0.75
Study16042 PHT 10 mpk	10	4	38.4981	1.26035		0.25
Study16042 PHT 30 mpk	30	4	120.646	0.819775		0
Study16042 PHT 56 mpk	56	5	109.171	3.78403		0
Study16189 PHT 10 mpk	10	7	29.4623	1.92604		0.15
Study16189 PHT 30 mpk	30	7	76.4798	4.39533		0
Study16202 PHT 1 mpk P75	1	7	2.62802	0.071903		1
Study16202 PHT 3 mpk P75	3	7	7.15441	0.341946		0.858
Study18085 PHT 2 mpk	2	6	1.841	0.2288			0.667
StudyMD16030 PHE 4 mpk	4	6	3.518	0.7324			0.33
StudyMD16030 PHE 8 mpk	8	6	6.974	1.659			0.167
