# Supplementary material for: NBI-921352, a first-in-class, NaV1.6 selective, sodium channel inhibitor that prevents seizures in Scn8a gain-of-function mice, and wild-type mice and rats
Source: eLife. 2022 Mar 2;11:e72468. doi: 10.7554/eLife.72468 (PMC8903829; doi:10.7554/eLife.72468)
Supplement: Figure 7—source data 1. [file elife-72468-fig7-data1.xlsx]

## Sheet: Figures 6 and 7
	Dose (mg/kg)	n (animals)	Mean [Palsma] (uM)	[Plasma] Std Err (uM)	WT mouse DC-MES acute	SCN8A mouse 6HZ	Rat DC-MES
					Fraction of animals seizing	Fraction of animals seizing	Fraction of animals seizing
Study18003 Lacosamide 3 mpk	3	8	3.25315	0.101516	0.625
Study18003 Lacosamide 10 mpk	10	8	9.52123	0.515145	0.375
Study18003 Lacosamide 30 mpk	30	8	26.7055	1.53914	0.125
Study18053 Lacosamide 3 mpk	3	9	6.20747	0.676289	0.666667
Study18063 Lacosamide 3 mpk	3	8	4.45668	0.267554	0.75
Study18007 Lacosamide 3 mpk	3	7	3.48037	0.117206		0.429
Study18007 Lacosamide 10 mpk	10	7	10.6975	0.545595		0.286
Study18007 Lacosamide 30 mpk	30	7	25.1898	1.52443		0.286
Study18011 Lacosamide 1 mpk	1	7	1.11685	0.0713962		0.858
Study18011 Lacosamide 30 mpk	30	6	29.629	2.47785		0.5
Study18011 Lacosamide 56 mpk	56	7	44.6672	4.49775		0.286
Study18028 Lacosamide 10 mpk	10	8	11.8102	0.730483		0.375
Study18042 Lacosamide 10 mpk	10	8	14.3758	1.98287		0.5
Study18060 Lacosamide 2 mpk	2	7	2.9654	0.188308			1
Study18060 Lacosamide 6 mpk	6	7	8.42538	0.325018			0.857143
Study18060 Lacosamide 12 mpk	12	7	22.943	1.82888			0.571429
Study18068 Lacosamide 100 mpk	100	7	73.529	5.1378			0
Study17131 CBZ 10 mpk	10	7	13.6034	1.44778	0.714286
Study17131 CBZ 30 mpk	30	7	34.5017	2.54085	0.428571
Study17131 CBZ 100 mpk	100	7	91.2576	9.47032	0.142857
Study17134 CBZ 10 mpk	10	7	16.5691	1.13842	0.857143
Study17134 CBZ 30 mpk	30	7	52.4789	5.95612	0.428571
Study15064 CBZ 3 mpk	3	4	1.13842	0.211109		0.5
Study15064 CBZ 10 mpk	10	5	5.95612	1.12878		0.75
Study16152 CBZ 3 mpk	3	4	4.75314	0.488681		0.75
Study16152 CBZ 10 mpk	10	3	15.4279	1.35335		0.667
Study16152 CBZ 30 mpk	30	5	48.666	2.3586		0
Study16162 CBZ 3 mpk	3	4	7.45969	0.671547		0.8
Study16162 CBZ 10 mpk	10	5	20.6967	1.61055		0.4
Study16162 CBZ 100 mpk	100	5	154.061	13.7376		0
Study18058 CBZ 3 mpk	3	7	0.966207	0.101102			1
Study18058 CBZ 10 mpk	10	7	4.27477	0.440721			0.857
Study18058 CBZ 20 mpk	20	7	11.3127	1.07176			0.714
Study18068 CBZ 30 mpk	30	7	23.9889	2.10817			0.571
Study18068 CBZ 100 mpk	100	7	42.7024	4.51039			0.428
Study18085 CBZ 300 mpk	300	7	65.9128	2.64575			0.285
Study16130 Phenytoin 5 mpk	5	7	16.0958	0.738701	0.571429
Study16130 Phenytoin 10 mpk	10	7	30.7332	0.753658	0
Study17131 Phenytoin 2 mpk	2	6	3.41999	0.240074	0.666667
Study17136 Phenytoin 2 mpk	2	7	3.651	0.236435	0.714286
Study17136 Phenytoin 5 mpk	5	8	11.536	0.503469	0.625
Study16042 PHT 1 mpk	1	4	1.79763	0.0997517		1
Study16042 PHT 3 mpk	3	4	7.58432	0.322308		0.75
Study16042 PHT 10 mpk	10	4	32.6675	2.81326		0.25
Study16042 PHT 30 mpk	30	4	92.6612	4.41164		0
Study16042 PHT 56 mpk	56	5	127.343	10.1696		0
Study16189 PHT 10 mpk	10	7	26.0411	1.04184		0.15
Study16189 PHT 30 mpk	30	7	59.0466	4.59624		0
Study16202 PHT 1 mpk P75	1	7	2.47724	0.0932754		1
Study16202 PHT 3 mpk P75	3	7	7.16307	0.184482		0.858
Study18085 PHT 2 mpk	2	6	3.4567	0.401063			0.667
StudyMD16030 PHE 4 mpk	4	6	5.74356	0.634131			0.33
StudyMD16030 PHE 8 mpk	8	6	12.1273	1.75365			0.167
